1 **Mortality without springing a leak: Locust gut epithelia do not become more**  
2 **permeable to fluorescent dextran and bacteria in the cold**

3

4 Mahmoud I. El-Saadi<sup>1</sup>, Kaylen Brzezinski<sup>1</sup>, Aaron Hinz<sup>1</sup>, Laura Phillips<sup>1</sup>, Alex Wong<sup>1</sup>, Lucie  
5 Gerber<sup>2</sup>, Johannes Overgaard<sup>3</sup>, and Heath A. MacMillan<sup>1</sup>

6

7 1. Department of Biology, Carleton University, Ottawa, Canada, K1S 5B6

8 2. Department of Bioscience, University of Oslo, Oslo, Norway

9 3. Department of Biology, Aarhus University, Aarhus, Denmark

10

11 **Keywords:** Chilling injury; gut bacteria; microbiome; immunity; paracellular leak; dextran

12

## 13 **Abstract**

14           The insect gut, which plays a role in ion and water balance, has been shown to leak  
15 solutes in the cold. Cold stress can also activate insect immune systems, but it is unknown if the  
16 leak of the gut microbiome is a possible immune trigger in the cold. We developed a novel  
17 feeding protocol to load the gut of locusts (*Locusta migratoria*) with fluorescent bacteria before  
18 exposing them to -2°C for up to 48 h. No bacteria were recovered from the hemolymph of cold-  
19 exposed locusts, regardless of exposure duration. To examine this further, we used an *ex vivo* gut  
20 sac preparation to re-test cold-induced fluorescent FITC-dextran leak across the gut and found no  
21 increased rate of leak. These results question not only the validity of FITC-dextran as a marker  
22 of paracellular barrier permeability in the gut, but also to what extent the insect gut becomes  
23 leaky in the cold.

24

25

## 26 Introduction

27 The majority of insects are chill-susceptible, meaning they suffer negative effects of  
28 chilling (chilling injuries) at low temperatures well above the freezing point of their body fluids  
29 (Overgaard and MacMillan, 2017). As temperatures drop below an insect's critical thermal  
30 minimum ( $CT_{min}$ ), they lose coordinated motor control. Continued cold exposure eventually  
31 leads to the onset of chill-coma, a state characterized by a complete but reversible paralysis  
32 (Andersen et al., 2015; Hazell and Bale, 2011; MacMillan and Sinclair, 2011; Rodgers et al.,  
33 2010). Prolonged exposure to low temperatures leads to tissue damage in the insect, and these  
34 chilling injuries can accumulate and increase in severity if temperatures remain. Chilling injuries  
35 are thought to be largely driven by cell death resulting from a loss of ion homeostasis (Andersen  
36 et al., 2017a; Bayley et al., 2018; Carrington et al., 2020; Košťál et al., 2004; MacMillan and  
37 Sinclair, 2011b; Overgaard et al., 2021). Water and ion balance play a key role in maintaining  
38 neuromuscular function, but at low temperatures, active transport rates of solutes are slowed to a  
39 point where they cannot counterbalance the passive leak of solutes and water (Overgaard et al.,  
40 2021).

41 The insect gut is structurally divided into three regions: foregut, midgut, and hindgut,  
42 and plays a major role in maintaining this osmotic and ionic balance at benign conditions  
43 (MacMillan and Sinclair, 2011a). Mechanical breakdown of food occurs in the foregut, the bulk  
44 of digestion and nutrient absorption happens in the midgut, and any water remaining is  
45 reabsorbed in the hindgut before the digested bolus passes into the rectum and is excreted (Linsler  
46 and Dinglasan, 2014; Phillips et al., 1987). Additionally, the hindgut and specialized diverticulae  
47 known as Malpighian tubules (analogous to human kidneys) work together to maintain renal  
48 function (MacMillan and Sinclair, 2011b; MacMillan et al., 2017; Overgaard et al., 2021;  
49 Yerushalmi et al., 2018). Water and ions can move across renal epithelia in two primary ways:  
50 transcellularly through aquaporins, ion transporters, or channels, or paracellularly through  
51 structures called septate junctions (Izumi and Furuse, 2014; Jonusaite et al., 2016; Jonusaite et  
52 al., 2017a; Jonusaite et al., 2017b). These junctions are ladder-like protein complexes located  
53 between gut epithelial cells that regulate the passive movement of solutes and water (MacMillan  
54 et al., 2017; O'Donnell, 2008; Phillips et al., 1987).

55 Under optimal environmental conditions, transport and leak rates are balanced such that  
56 hemolymph water volume and  $[Na^+]$  remain high, while  $[K^+]$  concentration remains low (D'Silva

57 et al., 2017; Harvey et al., 1983; MacMillan and Sinclair, 2011b; MacMillan et al., 2015b;  
58 Overgaard and MacMillan, 2017). At low temperatures, ion and water homeostasis become  
59 disrupted when a net leak of Na<sup>+</sup> and water into the gut lumen occurs, reducing hemolymph  
60 volume (MacMillan and Sinclair, 2011b). Recent evidence has suggested that gut epithelial  
61 barriers of both *Drosophila melanogaster* and *Locusta migratoria* become disrupted in the cold.  
62 This failure of barrier function has been hypothesized to contribute to ion balance disruption in  
63 the cold by allowing water and/or solutes to leak down their electrochemical gradients (Andersen  
64 et al., 2017b; Brzezinski and MacMillan, 2020; MacMillan et al., 2017). In both locusts and  
65 *Drosophila*, this leak was observed *in vivo* using the fluorescently labelled dextran (FITC-  
66 dextran, 3-5 kD), a molecule used frequently in epithelial barrier research because it is too large  
67 to move transcellularly and cannot be metabolized by animals (Andersen et al., 2017b;  
68 Brzezinski and MacMillan, 2020; Jensen-Jarolim et al., 1998; MacMillan et al., 2017; Woting  
69 and Blaut, 2018). Brzezinski and MacMillan (2020) found that dextran leak in the cold occurs  
70 unidirectionally from the gut to the hemocoel when fed to locusts, but not in the opposite  
71 direction when injected into the hemocoel, implying that gut contents may be particularly likely  
72 to leak into the hemocoel of insects during cold stress.

73 In addition to regulating the flow of water and ions, the gut also houses an abundant  
74 microbial community which is primarily composed of bacteria and yeasts (Dillon and Dillon,  
75 2004; Padilla, 2016; Wong et al., 2011). Recent studies suggests that gut bacteria and yeasts may  
76 affect an insect's survival at low temperatures. For example, *D. melanogaster* with a healthy gut  
77 flora exhibit significantly increased cold tolerance (Henry and Colinet, 2018; Moghadam et al.,  
78 2018; Padilla, 2016). However, immune activation, typically associated with bacterial pathogens,  
79 has also been reported in adult and larval *D. melanogaster* in response following cold stress.  
80 Specifically, the cold stress response is characterized by increased expression of genes in the  
81 Toll, immune deficiency (Imd), and/or Janus kinase (JAK)-signal transducer and activator of  
82 transcription (STAT) pathways (Salehipour-shirazi et al., 2017; Sinclair et al., 2013; Štětina et  
83 al., 2019).

84 These repeated reports of immune activation in the cold could putatively be explained by the  
85 presence of bacteria in the hemolymph that originate from the “leaky” gut, but no studies so far  
86 have directly tested if gut bacteria leak into the hemocoel of insects after a cold exposure. Here,  
87 we used *in vivo* and *ex vivo* experiments with migratory locusts to test the hypothesis that

88 immune activation, previously observed in cold stressed insects, is a direct response to cold-  
89 induced bacterial leak from the gut.

90

## 91 **Materials and methods:**

### 92 *Locust rearing*

93 Locusts (*Locusta migratoria*) used in the experiments were derived from a colony  
94 maintained at Carleton University, Ottawa, ON. The colony was reared on a 16 h:8 h light:dark  
95 cycle at 28°C at 60% relative humidity, under crowded conditions. All locusts were provided  
96 with a dry mixture of oats, wheat germ, wheat bran, and dry milk powder, as well as fresh wheat  
97 clippings, three days a week *ad libitum*. All locusts used in experiments were sexed and equal  
98 numbers of males and females were used in all experiments.

### 99 *Chill-coma recovery time and chilling injury scores*

100 Cold tolerance of locusts was quantified using chill coma recovery time (CCRT) and  
101 degree of chilling injuries (injury score). The methodology used here was slightly modified from  
102 Brzezinski and MacMillan (2020). Locusts from the colony were collected on the day of the  
103 experiment and placed individually in 50 mL polypropylene falcon tubes ( $n = 10$  for each group).  
104 Holes were made in the lids of the tubes, which provided locusts access to air for the duration of  
105 the experiment. Control locusts were placed in an incubator (Isotemp BOD Refrigerated  
106 Incubator 3720A; Thermo Fisher Scientific, ON, Canada) with dry oat mixture and fresh wheat  
107 clippings for 48 h at 25°C. Locusts undergoing cold stresses were suspended in a circulating  
108 cooling bath (Model AP28R-30; VWR International, Radnor, PA, USA) using a Styrofoam rig.  
109 The bath was filled with 100% ethylene glycol, pre-set to 25°C, and cooled to -2°C at a rate of -  
110 0.25°C min<sup>-1</sup>. Locusts were then left at -2°C for 12, 24, 36, or 48 h. Temperature was monitored  
111 and confirmed throughout the duration of the cold exposure using type-K thermocouples (TC-08  
112 Data Logger; Picotech, Texas, USA) in the glycol and in the hemocoel of an additional locust not  
113 used in the experiments. After each time point, locusts, in their comatose state, were removed  
114 from their tubes and placed on their side on a clean bench at room temperature (24.0-25.0°C). To  
115 measure CCRT, each locust was closely monitored for the time taken to regain neuromuscular  
116 function and stand on all six legs, which was recorded as that locust's CCRT. A 90 min cut-off

117 point was used, after which any locust that had failed to stand on all legs was marked as  
118 “unrecovered”.

119 After 90 min, locusts (regardless of their state) were placed in clean 50 mL  
120 polypropylene tubes with dry oat mixture and fresh wheat clippings and left to recover in the  
121 incubator at 25°C. After 24 h at 25°C, an injury assessment was done by a single assessor (M.E)  
122 using a 5-point scale adapted from MacMillan et al. (2014). Scores were defined as follows: 0:  
123 no movement observed (dead); 1: limb movement (leg and/or head twitching); 2: greater limb  
124 movement (leg extension and retraction, and whole body twitching), but unable to stand; 3: able  
125 to stand, but unable or unwilling to walk or jump; 4: able to stand, walk, and or jump, but lacks  
126 coordination; and 5: movement restored similar to pre-exposure levels of coordination. After  
127 scoring injury, locusts were returned to their respective tubes with replenished oats and wheat  
128 clippings and placed in the incubator. The injury assessment was repeated three more times for  
129 each locust – two, three, and four days (48, 72, 96 h) post-cold exposure.

130

### 131 *Development of fluorescent bacteria feeding protocol*

132 To be confident that any bacteria present in the hemolymph originated from the gut  
133 lumen, we developed a novel feeding and bacterial leak assay. This protocol used a mutant  
134 fluorescent strain of *E. coli*, *GFPmut3* ( $\lambda_{\text{max}}$  excitation: 500 nm,  $\lambda_{\text{max}}$  emission: 513 nm) with a  
135 green fluorescent gene on a plasmid alongside an ampicillin-resistant gene (Chalova et al., 2008;  
136 Zhao et al., 2008) and preliminary trials were conducted to optimize the assay. In the final  
137 protocol, an overnight culture of *GFPmut3 E. coli* was grown in LB Broth containing ampicillin  
138 (100  $\mu\text{g}$  ampicillin  $1 \text{ mL}^{-1}$  media) in an incubator at 37°C (Model MIR-154; PHC Corporation,  
139 Wood Dale, IL, USA). Then, 125 mL of medium was centrifuged at 8000 rpm (9730 x g) for 15  
140 min (Sorvall RC 6 Plus; Thermo Scientific, Waltham, MA, USA). The supernatant was  
141 discarded, and the bacterial pellet was resuspended in 1.25 mL of distilled water in a 2 mL  
142 centrifuge tube, effectively concentrating the bacterial solution 100-fold. Ten 3 cm strands of  
143 freshly cut wheat were added to the tube and allowed to soak for 24 h in an incubator at 37°C.  
144 Simultaneously, locusts that were to be used in the experiments were moved to a separate cage  
145 for 24 h with no wheat or oats to fast (which ensured they would eat the soaked wheat when  
146 presented with it). Each locust was then placed in separate plastic containers (36.3 x 25.1 x 59.9  
147 centimeters), with holes in the lid, along with their own bacteria-soaked wheat where they fed for

148 24 h in an incubator at 25°C. Further details on the validation of this protocol are included in the  
149 supplementary material.

150

### 151 *Investigating cold-induced bacterial leak from the gut*

152 To test whether bacteria in the gut leak into the hemolymph during cold stress, locusts  
153 were suspended in a cooling bath at -2°C for 12, 24, 36, or 48 h ( $n = 6$ ,  $n = 10$  for 48 h group)  
154 following 24 h of feeding on the wheat soaked in the fluorescent bacteria solution. Control  
155 locusts were kept in the incubator at 25°C for 48 h with wheat and oats provided *ad libitum*. To  
156 collect hemolymph, locusts were pricked dorsally at the head-thorax junction. Hemolymph was  
157 then collected using techniques adapted from Findsen et al. (2013). A 50 µL capillary tube was  
158 used to collect hemolymph via capillary action at the site of injury. By inserting a pipette tip at  
159 the end of the capillary tube, 10 µL of hemolymph was drawn and pipetted into 190 µL of sterile  
160 locust saline (in mmol L<sup>-1</sup>: 140 NaCl, 8 KCl, 2.3 CaCl<sub>2</sub> Dihydrate, 0.93 MgCl<sub>2</sub> Hexahydrate, 1  
161 NaH<sub>2</sub>PO<sub>4</sub>, 90 sucrose, 5 glucose, 5 trehalose, 1 proline, 10 HEPES, pH 7.2) in a centrifuge tube,  
162 and this process was completed twice to generate two hemolymph samples from each animal.  
163 After briefly vortex mixing, one of the 200 µL solutions was spread on a petri dish containing  
164 LB with ampicillin, and the other solution was spread on an LB agar plate without ampicillin.  
165 Both plates were then incubated at 37°C. The plates were checked for colony growth every day  
166 for four days. Colony forming units (CFU µL<sup>-1</sup>) in extracted hemolymph samples were then  
167 determined using serial dilution plating on LB agar plates containing ampicillin.

168 Bacterial leak could plausibly occur following, rather than during, a cold stress, so we  
169 performed a follow up experiment to test for bacterial leak following a 6 h rewarming period  
170 after the cold stress. Cold exposures were done in an identical manner as described above  
171 following bacterial feeding. In this case, however, locusts ( $n = 6$  in each group) were placed in  
172 small plastic deli containers after the cold stress, with freshly cut wheat (not soaked in the  
173 bacterial solution) and dry oat mixture in excess. The containers with the locusts were then  
174 placed in the incubator and left to recover at 25°C for 6 h.

175 To ensure that fluorescent bacteria that are present in the hemolymph of cold-stressed  
176 locusts could be recovered using our extraction method, we included a positive control. Locusts  
177 ( $n = 4$ ) were suspended in a cooling bath and were left undisturbed while the bath ramped down  
178 to -2°C. Individuals were then removed and were injected dorsally at the head-thorax junction



179 with 10  $\mu\text{L}$  of a  $1.46 \times 10^8$  CFU  $\text{mL}^{-1}$  solution of *GFPmut3 E. coli* in sterile locust saline. The  
180 injection site was then sealed with high vacuum grease (Dow Corning, Etobicoke, ON, Canada)  
181 before returning the locusts back to the cooling bath for 1 h at  $-2^\circ\text{C}$ . Hemolymph samples were  
182 then collected as above.

183

#### 184 *Determining the role of gut bacteria in cold-induced paracellular barrier disruption*

185 To better investigate cold-induced paracellular leak across the gut *ex vivo* and in the  
186 absence of the natural gut microbiome, we tested for leak of FITC-dextran (FD4; 3–5 kDa,  
187 Sigma-Aldrich, St Louis, MO, USA) from isolated gut segments of *L. migratoria* using a  
188 modified gut sac approach (Gerber and Overgaard, 2018; Hanrahan et al., 1984). We modified  
189 the preparation by 1) not everting the gut segments, and 2) inserting two separate pieces of  
190 polyethylene tubing on the anterior and posterior side of each segment. On the day of the  
191 experiment, locusts were decapitated and prepared for dissection by removing all appendages.  
192 The thorax and abdomen were placed in a Sylgaard-lined petri dish and locust saline was used to  
193 keep tissues moist during dissections. An incision was made in the anterior to posterior direction  
194 along the ventral side to pin open the body cavity. All structures aside from the gut tract were  
195 cleared away before the segments were isolated. Portions of the gut were isolated in a manner  
196 convenient to the method being applied rather than by anatomical definition. Briefly, the  
197 segments were described as follows: anterior, from the anterior-most portion of the esophagus to  
198 the midgut caecae, central, from posterior of the midgut caecae to the midgut-hindgut junction  
199 where the Malpighian tubules connect, and posterior, from the anterior-most portion of the ileum  
200 to the posterior end of the rectum.

201 To suspend each isolated gut segment within our system, a heat flared polyethylene tube  
202 (PE tube; VWR ID x OD: 0.023 x 0.038", Radnor, USA) was inserted and tied into the anterior  
203 margin of the section. Once secure, standard locust saline was injected through the PE tube to  
204 thoroughly rinse out the gut contents, including the vast majority of the gut microbiome. A  
205 second heat flared PE tube was then inserted and tied into the posterior margin of the segment.  
206 Preparations were kept in a petri dish containing continuously oxygenated (95% O<sub>2</sub>, 5% CO<sub>2</sub>,  
207 Praxair, Danbury, USA) saline at room temperature ( $23^\circ\text{C}$ ) until all three segments had been  
208 prepared for suspension. Once complete, a  $9.6 \times 10^{-4}$  M FITC-dextran solution was injected via  
209 PE tube into each preparation until it had filled both PE tubes, ensuring the lumen was filled with



210 the saline containing the FITC-dextran. Each preparation was suspended in a beaker containing  
211 25 mL of continuously oxygenated locust saline, which acted as our serosal environment. After a  
212 30 min rest period at room temperature to allow for tissue stabilization, the beaker was moved  
213 into the cooling bath (preset at 0°C) and monitored for 5 h (Gerber and Overgaard, 2018).  
214 Preparations were then removed from the cooling bath and monitored for an additional 2 h at  
215 room temperature to account for any effect that rewarming had on the rate of leak.

216 Throughout the experiment, 90  $\mu$ L aliquots were collected directly from the beakers once  
217 every hour for the duration of the experiment and transferred to a 96-well plate (Corning Falcon  
218 Imaging Microplate; black/clear bottom) for fluorescence spectrophotometry ( $\lambda_{\text{max}}$  excitation:  
219 485 nm,  $\lambda_{\text{max}}$  emission: 528 nm; BioTek Cytation 5 Imaging Reader, Winooski, USA).  
220 Concentrations of FITC-dextran in the samples were determined by reference to a standard curve  
221 of FITC-dextran in locust saline. The results obtained from fluorescent analyses were then  
222 plotted to obtain leak rates per  $\text{cm}^2$  of gut tissue for all preparations. Briefly, the slope ([FITC-  
223 dextran] ( $\mu\text{mol}$ ) against Time (h)) of each gut sac sample and measurements of tissue length and  
224 width (treated as cylindrical surface area) were used to calculate leak rates per  $\text{cm}^2$  of gut tissue.

225

#### 226 *Data analysis*

227 All collected data were analyzed in R Studio version 3.5.3 (R Core Team, 2019). The  
228 distribution and variance of residuals were assessed using Shapiro-Wilk tests and Q-Q plots,  
229 which supported the use of non-parametric tests. The effect of cold duration on CCRT was  
230 analyzed with a Kruskal-Wallis (KW) test followed by pairwise Wilcoxon tests with the  
231 Benjamini-Hochberg (BH) correction. Since the assumption of normality was not met, a  
232 generalized linear model (glm) with a Poisson distribution was used to test for the effect of cold  
233 duration and assessment day on injury scores. A KW test followed by pairwise Wilcoxon tests  
234 (with BH correction) were used to test for significant differences in injury scores on the first and  
235 fourth assessment days following the cold exposures. Again, because of the non-normal  
236 distribution of the data, a glm with a Poisson distribution was used to examine the effect of  
237 bacterial feeding on chilling injuries. Cold exposure duration was held as a fixed categorical  
238 variable, while assessment day was held as a continuous variable (in their respective analyses).  
239 For the *ex vivo* gut sac experiment, FITC-dextran leak/ $\text{cm}^2$  of tissue in the cold and post-cold  
240 was analyzed via the `lmer()` function (`lme4` and `lmerTest` packages for R). Time was held as a

241 continuous factor, gut segment as a fixed effect, and each individual locust as a random effect.  
242 Finally, paired t-tests were done to compare the rates of FITC-dextran leak/cm<sup>2</sup> of gut tissue in  
243 the cold and post-cold. Log<sub>10</sub> of the *ex vivo* gut data were used for statistical analyses. Values  
244 presented on all graphs are shown as mean ± standard deviation with the  $\alpha$ -level being 0.05 for  
245 all statistical tests. For the gut bacterial leak assay, no statistics were used to analyze growth on  
246 plates due to lack of any colonies observed from the cold-stressed locusts.  
247

## 248 **Results and discussion**

### 249 *Chill-coma recovery time and survival score following cold exposures*

250 Chill-coma recovery times significantly increased from 19.3 ± 7.07 min after 12 h at -2°C  
251 to 80.4 ± 2.95 mins after 48 h at -2°C (for those locusts that recovered within the 90 min cut off  
252 period; KW,  $\chi^2 = 17.67$ ,  $P < 0.001$ ). Longer cold exposures also resulted in fewer locusts  
253 recovering before the 90 min cut-off. Exposure to -2°C for 12 or 24 h yielded a 100% recovery  
254 rate, which decreased to 75% at 36 h and 37.5% at 48 h (Figure 1A).

255 Chilling injuries were quantified using injury scores that clearly demonstrated how longer  
256 cold exposures led to higher degrees of injury (lower injury scores; GLM,  $F_{4,140} = 44.62$ ,  $P <$   
257  $0.001$ ) (Figure 1B and C). Over the four days following the cold stresses, chilling injuries  
258 worsened (GLM,  $F_{3,140} = 4.30$ ,  $P = 0.006$ ; Figure 1D). This effect, however, was only significant  
259 when we included the 48 h cold exposure group in the statistical model, suggesting that  
260 particularly severe injuries get progressively worse after the cold stress (compare Figure 1B and  
261 C).

262 As previously found in the same species (e.g. Andersen et al., 2017a; Brzezinski and  
263 MacMillan, 2020; MacMillan et al., 2014) we here find that increasing durations of exposure to  
264 low temperature (-2°C) results in higher degrees of injury (Fig. 1). Latent chilling injuries  
265 manifested in locusts exposed to -2°C for 48 h, quantified by decreasing injury scores (more  
266 severe chilling injuries) over a three day period after the first survival assessment. A similar  
267 pattern was found in *D. melanogaster* exposed to a relatively long cold stress (25 h) at 0°C;  
268 where lower injury scores one day after the cold stress led to significantly more deaths the

269 following three days after removal from the cold (El-Saadi et al., 2020). These results from  
270 *D. melanogaster* and *L. migratoria* suggest that chilling injuries do not fully heal and may even  
271 continue to worsen in the days following removal of the insect from a severe cold stress (Figure  
272 4; El-Saadi et al., 2020).

### 273 *Bacterial leak across the gut following cold exposures*

274 If the continuous decline in survival is a result of bacterial infection or an adverse  
275 immune response (Sadd and Siva-Jothy, 2006), then this could be explained by bacteria leaking  
276 from the gut lumen into the hemocoel during or following a cold stress. To test this, we fed  
277 locusts a fluorescent strain of *E. coli* before exposing them to the cold. Immediately following a  
278 cold exposure, hemolymph samples were taken from locusts and spread on LB agar plates with  
279 or without ampicillin to look for *GFPmut3* colony growth exclusively or any colony growth,  
280 respectively. No bacterial colonies were seen on any plates (LB agar plates with or without  
281 ampicillin) containing hemolymph from the locusts, regardless of cold exposure duration (Table  
282 1). This finding was confirmed in an experiment to examine bacterial leak following a period of  
283 rewarming where locusts were left to recover with food at benign temperature for 6 h following  
284 the cold exposure. Similar to the acute experiments, no bacterial colonies were observed on any  
285 plates regardless of cold exposure duration (Table 1).

286 In another Orthopteran species, the spring field cricket (*Gryllus veletis*), the ability of the  
287 immune system to clear bacteria from the hemolymph is significantly reduced at low  
288 temperatures (Ferguson et al., 2016). This is also seen in some other orders of insects (Ferguson  
289 and Sinclair, 2017). As hemolymph was plated immediately after the cold stresses in one of our  
290 experiments, it is unlikely that the absence of bacteria was a result of immune-related bacterial  
291 clearance. In this case, there are two probable scenarios: 1) gut barriers maintain their integrity  
292 well enough to prevent septicemia, despite damage to the gut epithelia and leak of solutes, or 2)  
293 gut epithelia retain their barrier properties in the cold. From our data (see below) and those of  
294 Gerber and Overgaard (2018), the degree of FITC-dextran leak in the cold is insufficient to  
295 support a purported increase in gut barrier permeability which would have allowed bacteria to  
296 cross over in our experiments. Hence, the second explanation is more likely.

297 Since the leakage of gut bacteria is unlikely to explain the reported cold induced immune  
298 activation following cold stresses, one possibility is that this response is associated with the leak

299 of immunogenic components of bacteria such as lipopolysaccharide (LPS). Although purified  
300 LPS has been shown to not activate the Imd pathway in *Drosophila* (Kaneko et al., 2004), it does  
301 induce overexpression of antimicrobial peptide genes in silkworms (Tanaka et al., 2009).  
302 Another possibility is the gradual development of cellular damage and an associated leak of  
303 intracellular proteins such as actin. Tissue injury or cell death can lead to the release of actin into  
304 the hemolymph of insects (Dominguez and Holmes, 2011). Srinivasan et al. (2016) clearly show  
305 that actin in the hemolymph of *D. melanogaster* elicits an immune response via JAK/STAT  
306 pathway activation. Cold-stressed insects exhibit a disrupted cytoskeleton in cells (Cottam et al.,  
307 2006; Des Marteaux et al., 2018) and cold exposures lead to an upregulation of genes important  
308 in the maintenance of the cytoskeleton (Kim et al., 2006; MacMillan et al., 2016; Teets et al.,  
309 2012), providing further support to this hypothesis.

#### 310 *FITC-dextran leak across epithelia of isolated gut segments*

311 To examine whether the locust gut becomes leaky enough in the cold to permit increased  
312 FITC-dextran movement, we used a modified gut sac technique to examine *ex vivo* leak of FITC-  
313 dextran in the absence of the vast majority of the natural gut microbiota. At 0°C, no significant  
314 differences between FITC-dextran leak rates were found between the segments (Fig. 2; LME,  
315  $F_{2, 15} = 1.03$ ,  $P = 0.379$ ). The same was true for segments held at room temperature over the  
316 course of experiments (LME,  $F_{2, 10} = 0.989$ ,  $P = 0.406$ ). When comparing between both  
317 temperature treatments (-2°C or 23°C), FITC-dextran leak rates did not significantly differ  
318 between segments (LME,  $F_{2, 30} = 0.882$ ,  $P = 0.424$ ) or between treatments (LME,  $F_{1, 30} = 1.04$ ,  
319  $P = 0.315$ ). Furthermore, there was no statistically significant interaction between the gut  
320 segment and type of treatment received when analyzing FITC-dextran leak rates (LME,  $F_{2, 30} =$   
321  $1.10$ ,  $P = 0.346$ ; Figure 2). Finally, no significant differences were found between leak rates after  
322 5 h of cold stress and after 2 h at 23°C following cold stress in any of the three segments  
323 (foregut: two-tailed  $t_5 = 0.668$ ,  $P = 0.534$ ; midgut: two-tailed  $t_5 = 1.19$ ,  $P = 0.288$ ; hindgut: two-  
324 tailed  $t_5 = 1.27$ ,  $P = 0.261$ ).

325 While the underlying mechanisms of cold-induced immune activation remain unclear, we  
326 also discuss to what extent the insect gut becomes leaky at low temperatures. When we exposed  
327 isolated gut segments to the cold *ex vivo*, we found no significant increase in the rate of FITC-  
328 dextran leak from the lumen to the surrounding solution compared to isolated gut sacs at benign

329 temperature (Figure 3). This agrees with a previous study on the same species using everted  
330 rectal sacs *ex vivo*, where no change was found in the mucosal-to-serosal clearance of FITC-  
331 dextran in the cold (Gerber and Overgaard, 2018). Together, these data now lead us to question  
332 not only the validity of FITC-dextran as a marker of paracellular permeability, but also whether  
333 gut epithelial barriers become leaky at all. A common factor in the studies that reported FITC-  
334 dextran leak in the mucosal to serosal direction at low temperatures was that the FITC-dextran  
335 was administered to the insects orally. The ingestion of FITC-dextran means that it would be  
336 concentrated in the gut initially, where there also exists an abundant microbial community. Some  
337 bacterial species produce dextranases which cleave larger dextran molecules into smaller  
338 fragments (Khalikova et al., 2005). If these bacterial species are present in the gut of healthy  
339 locusts, then it would explain the leak of FITC-dextran at benign temperature which would most  
340 likely arise from the fragmentation of the large FITC-dextran molecule into smaller  
341 polysaccharides.

342         The findings from the present study may shift our understanding of barrier failure in cold  
343 stressed insects and raise questions as to what may trigger an insect's immune system in the cold.  
344 Considering that we did not find any evidence of bacterial leak from the gut, we propose that  
345 immune activation in the cold may arise from sterile causes, possibly as a result of cell damage  
346 from chilling injuries, or immunogenic molecules from microbes. From this standpoint, we  
347 suggest future studies should attempt to examine cold-induced immune activation by looking at  
348 damage- or pathogen-associated molecular patterns such as actin and lipopolysaccharide in the  
349 hemocoel following cold stresses.

### 350 **Acknowledgements**

351         We wish to thank Jeffery Dawson and Marshall Ritchie for assistance with locust rearing  
352 and colony maintenance; Amanda Carroll for help with procuring bacterial stocks and early  
353 troubleshooting with microbiological techniques, and Laura Ferguson for valuable discussion in  
354 the early stages of the study's design.

### 355 **Competing interests**

356         The authors declare no competing or financial interests.

357 **Author contributions**

358 Conceptualization: M.E., H.M., L.G.; Methodology: M.E., H.M., A.W., A.H., L.P., L.G.,  
359 J.O.; Resources: H.M., A.W.; Data curation and analysis: M.E., K.B.; Writing – original draft:  
360 M.E.; Writing – review and editing: H.M., J.O., A.W., K.B., L.G., A.H., L.P., M.E.;  
361 Visualization: M.E.; Supervision: H.M.; Project administration: H.M.; Project funding: H.M.

362 **Funding**

363 This work was supported by a Natural Sciences and Engineering Research Council of  
364 Canada (NSERC) Discovery Grant to H.M. (RGPIN-2018-05322). Equipment used in this study  
365 was purchased through A Canadian Foundation for Innovation JELF and Ontario Research Fund  
366 Award to H.M.

367 **Data availability**

368 All data is provided as a supplementary file for review.

369 **References**

- 370 **Adamo, S. A.** (2004). Estimating disease resistance in insects: Phenoloxidase and lysozyme-like  
371 activity and disease resistance in the cricket *Gryllus texensis*. *J. Insect Physiol.* **50**, 209–  
372 216.
- 373 **Andersen, J. L., Findsen, A., & Overgaard, J.** (2013). Feeding impairs chill coma recovery in  
374 the migratory locust (*Locusta migratoria*). *J. Insect Physiol.*, **59**(10), 1041-1048.
- 375 **Andersen, M. K., Folkersen, R., MacMillan, H. A. and Overgaard, J.** (2017a). Cold-  
376 acclimation improves chill tolerance in the migratory locust through preservation of ion  
377 balance and membrane potential. *J. Exp. Biol.* **220**, 487–496.
- 378 **Andersen, M. K., MacMillan, H. A., Donini, A. and Overgaard, J.** (2017b). Cold tolerance of  
379 *Drosophila* species is tightly linked to epithelial K<sup>+</sup> transport capacity of the Malpighian  
380 tubules and rectal pads. *J. Exp. Biol.* jeb.168518.
- 381 **Andersen, J. L., Manenti, T., Sørensen, J. G., MacMillan, H. A., Loeschcke, V. and**  
382 **Overgaard, J.** (2015). How to assess *Drosophila* cold tolerance: Chill coma temperature  
383 and lower lethal temperature are the best predictors of cold distribution limits. *Funct.*  
384 *Ecol.* **29**, 55–65.
- 385 **Bang, I. S.** (2019). JAK/STAT signaling in insect innate immunity. *Entomol. Res.* **49**, 339–353.



- 386 **Bayley, J. S., Winther, C. B., Andersen, M. K., Grønkjær, C., Nielsen, O. B., Pedersen, T.**  
387 **H. and Overgaard, J.** (2018). Cold exposure causes cell death by depolarization  
388 mediated Ca<sup>2+</sup> overload in a chill-susceptible insect. *Proc. Natl. Acad. Sci. U. S. A.* **115**,  
389 E9737–E9744.
- 390 **Brzezinski, K. and MacMillan, H. A.** (2020). Chilling induces unidirectional solute leak  
391 through the locust gut epithelia. *J. Exp. Biol.* **223**.
- 392 **Carrington, J., Andersen, M. K., Brzezinski, K. and MacMillan, H. A.** (2020).  
393 Hyperkalaemia, not apoptosis, accurately predicts insect chilling injury. *Proc. R. Soc. B*  
394 **287**, 20201663.
- 395 **Charles, H. M. and Killian, K. A.** (2015). Response of the insect immune system to three  
396 different immune challenges. *J. Insect Physiol.* **81**, 97–108.
- 397 **Colinet, H., Larvor, V., Bical, R., and Renault, D.** (2013). Dietary sugars affect cold tolerance  
398 of *Drosophila melanogaster*. *Metabolomics* **9**, 608–622.
- 399 **Cottam, D. M., Tucker, J. B., Rogers-Bald, M. M., Mackie, J. B., Macintyre, J.,**  
400 **Scarborough, J. A., Ohkura, H., and Milner, M. J.** (2006). Non-centrosomal  
401 microtubule-organising centres in cold-treated cultured *Drosophila* cells. *Cell motil.*  
402 *Cytoskeleton*, **63**(2), 88-100.
- 403 **D’Silva, N. M., Donini, A. and O’Donnell, M. J.** (2017). The roles of V-type H<sup>+</sup>-ATPase and  
404 Na<sup>+</sup>/K<sup>+</sup>-ATPase in energizing K<sup>+</sup> and H<sup>+</sup> transport in larval *Drosophila* gut epithelia. *J.*  
405 *Insect Physiol.* **98**, 284–290.
- 406 **Davis, H. E., Cheslock, A. and MacMillan, H. A.** (2021). Chill coma onset and recovery fail to  
407 reveal true variation in thermal performance among populations of *Drosophila*  
408 *melanogaster*. *Sci. Reports 2021 111* **11**, 1–10.
- 409 **De Ro, M., Enriquez, T., Bonte, J., Ebrahimi, N., Casteels, H., De Clercq, P., & Colinet, H.**  
410 (2021). Effect of starvation on the cold tolerance of adult *Drosophila suzukii* (Diptera:  
411 Drosophilidae). *Bull. Entomol. Res.* **111**(6), 694-704.
- 412 **Des Marteaux, L. E., Štětina, T., & Košťál, V.** (2018). Insect fat body cell morphology and  
413 response to cold stress is modulated by acclimation. *J. Exp. Biol.* **221**(21), jeb189647.
- 414 **Dillon, R. J. and Dillon, V. M.** (2004). The gut bacteria of insects: nonpathogenic interactions .  
415 *Annu. Rev. Entomol.* **49**, 71–92.



- 416 **Dominguez, R., & Holmes, K. C. (2011).** Actin structure and function. *Annu. Rev. Biophys.* **40**,  
417 169-186.
- 418 **Dubovskiy, I. M., Kryukova, N. A., Glupov, V. V and Ratcliffe, N. A. (2016).** Encapsulation  
419 and nodulation in insects. *Invertebr. Surviv. J.* **13**, 229–246.
- 420 **El-Saadi, M. I., Ritchie, M. W., Davis, H. E. and MacMillan, H. A. (2020).** Warm periods in  
421 repeated cold stresses protect *Drosophila* against ionoregulatory collapse, chilling injury,  
422 and reproductive deficits. *J. Insect Physiol.* **123**, 104055.
- 423 **Ferguson, L. V., Heinrichs, D.E. and Sinclair, B.J. (2016.)** Paradoxical acclimation responses  
424 in the thermal performance of insect immunity. *Oecologia* **181**, 77–85.
- 425 **Ferguson, L. V. and Sinclair, B. J. (2017).** Insect immunity varies idiosyncratically during  
426 overwintering. *J. Exp. Zool. Part A Ecol. Integr. Physiol.* **327**, 222–234.
- 427 **Findsen, A., Andersen, J. L., Calderon, S. and Overgaard, J. (2013).** Rapid cold hardening  
428 improves recovery of ion homeostasis and chill coma recovery time in the migratory  
429 locust, *Locusta migratoria*. *J. Exp. Biol.* **216**, 1630–1637.
- 430 **Gerber, L., & Overgaard, J. (2018).** Cold tolerance is linked to osmoregulatory function of the  
431 hindgut in *Locusta migratoria*. *J. Exp. Biol.* **221**(5), jeb173930.
- 432 **Hanrahan, J. W., Meredith, J., Phillips, J. E. and Brandys, D. (1984).** Methods for the study  
433 of transport and control in insect hindgut. In *Measurement of ion transport and metabolic*  
434 *rate in insects* (ed. Bradley, T. J.), pp. 19–68. Springer-Verlag New York Inc.
- 435 **Harvey, W. R., Cioffi, M., Dow, J. A. and Wolfersberger, M. G. (1983).** Potassium ion  
436 transport ATPase in insect epithelia. *J. Exp. Biol.* **106**, 91–117.
- 437 **Hazell, S. P. and Bale, J. S. (2011).** Low temperature thresholds: are chill-coma and CT<sub>min</sub>  
438 synonymous? *J. Insect Physiol.* **57**, 1085–1089.
- 439 **Henry, Y. and Colinet, H. (2018).** Microbiota disruption leads to reduced cold tolerance in  
440 *Drosophila* flies. *Sci. Nat.* **105**.
- 441 **Hoffmann, J. A. (2003).** The immune response of *Drosophila*. *Nature* **426**, 33–38.
- 442 **Izumi, Y. and Furuse, M. (2014).** Molecular organization and function of invertebrate  
443 occluding junctions. *Semin. Cell Dev. Biol.* **36**, 186–193.
- 444 **Jensen-Jarolim, E., Gajdzik, L., Haberl, I., Kraft, D., Scheiner, O., & Graf, J. (1998).** Hot  
445 spices influence permeability of human intestinal epithelial monolayers. *J. Nutrition*,  
446 **128**(3), 577–581

- 447 **Jonusaite, S., Donini, A. and Kelly, S. P.** (2016). Occluding junctions of invertebrate epithelia.  
448 *J. Comp. Physiol. B Biochem. Syst. Environ. Physiol.* **186**, 17–43.
- 449 **Jonusaite, S., Donini, A. and Kelly, S. P.** (2017a). Salinity alters *snakeskin* and *mesh* transcript  
450 abundance and permeability in midgut and Malpighian tubules of larval mosquito, *Aedes*  
451 *aegypti*. *Comp. Biochem. Physiol. -Part A Mol. Integr. Physiol.* **205**, 58–67.
- 452 **Jonusaite, S., Kelly, S. P. and Donini, A.** (2017b). Identification of the septate junction protein  
453 gliotactin in the mosquito, *Aedes aegypti*: evidence for a role in increased paracellular  
454 permeability in larvae. *J. Exp. Biol.* **220**, 2354–2363.
- 455 **Kaneko, T., Goldman, W. E., Mellroth, P., Steiner, H., Fukase, K., Kusumoto, S. et al.**  
456 (2004). Monomeric and polymeric gram-negative peptidoglycan but not purified LPS  
457 stimulate the *Drosophila* IMD pathway. *Immunity*, **20**(5), 637–649.
- 458 **Khalikova, E., Susi, P., & Korpela, T.** (2005). Microbial dextran-hydrolyzing enzymes:  
459 fundamentals and applications. *Microbiol. Mol. Biol. Rev.* **69**(2), 306–325.
- 460 **Košťál, V., Vambera, J. and Bastl, J.** (2004). On the nature of pre-freeze mortality in insects:  
461 water balance, ion homeostasis and energy charge in the adults of *Pyrrhocoris apterus*. *J.*  
462 *Exp. Biol.* **207**, 1509–1521.
- 463 **Lee, R. E., Strong-Gunderson, J. M., Lee, M. R. and Davidson, E. C.** (1992). Ice-nucleating  
464 active bacteria decrease the cold-hardiness of stored grain insects. *J. Econ. Entomol.* **85**,  
465 371–374.
- 466 **Lee, R. E., Costanzo, J. P., Kaufman, P. E., Lee, M. R. and Wyman, J. A.** (1994). Ice-  
467 nucleating active bacteria reduce the cold-hardiness of the freeze-intolerant Colorado  
468 potato beetle (Coleoptera: Chrysomelidae). *J. Econ. Entomol.* **87**, 377–381.
- 469 **Lemaitre, B. and Hoffmann, J.** (2007). The host defense of *Drosophila melanogaster*. *Annu.*  
470 *Rev. Immun.* **25**, 697–743.
- 471 **Linsler, P. J. and Dinglasan, R. R.** (2014). Insect gut structure, function, development and  
472 target of biological toxins. *Adv. In Insect Phys.* **47**, 1–37.
- 473 **MacMillan, H. A. and Sinclair, B. J.** (2011a). Mechanisms underlying insect chill-coma. *J.*  
474 *Insect Physiol.* **57**, 12–20.
- 475 **MacMillan, H. A. and Sinclair, B. J.** (2011b). The role of the gut in insect chilling injury: cold-  
476 induced disruption of osmoregulation in the fall field cricket, *Gryllus pennsylvanicus*. *J.*  
477 *Exp. Biol.* **214**, 726–734.

- 478 **MacMillan, H. A., Findsen, A., Pedersen, T. H., & Overgaard, J.** (2014). Cold-induced  
479 depolarization of insect muscle: differing roles of extracellular K<sup>+</sup> during acute and  
480 chronic chilling. *J. Exp. Biol.* **217**, 2930–2938.
- 481 **MacMillan, H. A., Andersen, J. L., Davies, S. A. and Overgaard, J.** (2015a). The capacity to  
482 maintain ion and water homeostasis underlies interspecific variation in *Drosophila* cold  
483 tolerance. *Sci. Rep.* **5**.
- 484 **MacMillan, H. A., Baatrup, E. and Overgaard, J.** (2015b). Concurrent effects of cold and  
485 hyperkalaemia cause insect chilling injury. *Proc. R. Soc. B Biol. Sci.* **282**.
- 486 **MacMillan, H. A., Yerushalmi, G. Y., Jonusaite, S., Kelly, S. P. and Donini, A.** (2017).  
487 Thermal acclimation mitigates cold-induced paracellular leak from the *Drosophila* gut.  
488 *Sci. Rep.* **7**, 1–11.
- 489 **MacMillan, H. A.** (2019). Dissecting cause from consequence: a systematic approach to thermal  
490 limits. *J. Exp. Biol.*, **222**, jeb191193.
- 491 **Marshall, K. E., Sinclair, B.J.** (2010). Repeated stress exposure results in a survival-  
492 reproduction trade-off in *Drosophila melanogaster*. *Proc. R. Soc. B.* **277**, 963–969.
- 493 **Moghadam, N. N., Thorshauge, P. M., Kristensen, T. N., de Jonge, N., Bahrndorff, S.,  
494 Kjeldal, H. and Nielsen, J. L.** (2018). Strong responses of *Drosophila melanogaster*  
495 microbiota to developmental temperature. *Fly (Austin)*. **12**, 1–12.
- 496 **O'Donnell, M.** (2008). Insect excretory mechanisms. *Adv. In Insect Phys.* **35**, 1–122.
- 497 **Overgaard, J. and MacMillan, H. A.** (2017). The integrative physiology of insect chill  
498 tolerance. *Annu. Rev. Physiol.* **79**, 187–208.
- 499 **Overgaard, J., Gerber, L. and Andersen, M. K.** (2021). Osmoregulatory capacity at low  
500 temperature is critical for insect cold tolerance. *Curr. Opin. Insect Sci.* **47**, 38–45.
- 501 **Padilla, Y. J.** (2016). Effects of gut-associated yeasts on *Drosophila melanogaster* performance.  
502 *Electron. Thesis Diss. Repos.*, York University, Canada.
- 503 **Phillips, J. E., Thomson, B., Hanrahan, J. and Chamberlin, M.** (1987). Mechanisms and  
504 control of reabsorption in insect hindgut. *Adv. In Insect Phys.* **19**, 329–422.
- 505 **Ransberry, V. E., MacMillan, H. A. and Sinclair, B. J.** (2015). The relationship between chill-  
506 coma onset and recovery at the extremes of the thermal window of *Drosophila*  
507 *melanogaster*. *Physiol. Biochem. Zool.* **84**, 553–559.

- 508 **Rodgers, C. I., Armstrong, G. A. B. and Robertson, R. M.** (2010). Coma in response to  
509 environmental stress in the locust: A model for cortical spreading depression. *J. Insect*  
510 *Physiol.* **56**, 980–990.
- 511 **Rowley, A. F., Brookman, J. L. and Ratcliffe, N. A.** (1990). Possible involvement of the  
512 prophenoloxidase system of the locust, *Locusta migratoria*, in antimicrobial activity. *J.*  
513 *Invertebr. Pathol.* **56**, 31–38.
- 514 **Sadd, B. M. and Siva-Jothy, M. T.** (2006). Self-harm caused by an insect’s innate immunity.  
515 *Proc. R. Soc. B Biol. Sci.* **273**, 2571–2574.
- 516 **Salehipour-shirazi, G., Ferguson, L. V. and Sinclair, B. J.** (2017). Does cold activate the  
517 *Drosophila melanogaster* immune system? *J. Insect Physiol.* **96**, 29–34.
- 518 **Sinclair, B. J., Ferguson, L. V., Salehipour-shirazi, G. and MacMillan, H. A.** (2013). Cross-  
519 tolerance and cross-talk in the cold: Relating low temperatures to desiccation and  
520 immune stress in insects. *Integr. Comp. Biol.* **53**, 545–556.
- 521 **Slatyer, R. A. and Schoville, S. D.** (2016). Physiological limits along an elevational gradient in  
522 a radiation of montane ground beetles. *PLoS One* **11**, e0151959.
- 523 **Snodgrass, R. E.** (1929). The thoracic mechanism of a grasshopper, and its antecedents.  
524 *Smithson. Misc. Collect.* **82**, 1-111.
- 525 **Srinivasan, N., Gordon, O., Ahrens, S., Franz, A., Deddouche, S., Chakravarty, P., Phillips,**  
526 **D., Yunus, A. A., Rosen, M. K., Valente, R. S., et al.** (2016). Actin is an evolutionarily-  
527 conserved damage-associated molecular pattern that signals tissue injury in *Drosophila*  
528 *melanogaster*. *Elife* **5**, e19662.
- 529 **Štětina, T., Poupardin, R., Moos, M., Šimek, P., Šmilauer, P. and Košťál, V.** (2019). Larvae  
530 of *Drosophila melanogaster* exhibit transcriptional activation of immune response  
531 pathways and antimicrobial peptides during recovery from supercooling stress. *Insect*  
532 *Biochem. Mol. Biol.* **105**, 60–68.
- 533 **Tanaka, H., Sagisaka, A., Fujita, K., Kaneko, Y., Imanishi, S., & Yamakawa, M.** (2009).  
534 Lipopolysaccharide elicits expression of immune-related genes in the silkworm, *Bombyx*  
535 *mori*. *Insect Mol. Biol.* **18**(1), 71-75.
- 536 **Tang, C., Sun, F., Zhang, X., Zhao, T. and Qi, J.** (2004). Transgenic ice nucleation-active  
537 *Enterobacter cloacae* reduces cold hardiness of corn borer and cotton bollworm larvae.  
538 *FEMS Microbiol. Ecol.* **51**, 79–86.

- 539 **Teets, N. M., Peyton, J. T., Ragland, G. J., Colinet, H., Renault, D., Hahn, D. A., &**  
540 **Denlinger, D. L.** (2012). Combined transcriptomic and metabolomic approach uncovers  
541 molecular mechanisms of cold tolerance in a temperate flesh fly. *Physiol.*  
542 *Genomics*, **44**(15), 764-777.
- 543 **Troha, K., Nagy, P., Pivovar, A., Lazzaro, B. P., Hartley, P. S., & Buchon, N.** (2019).  
544 Nephrocytes remove microbiota-derived peptidoglycan from systemic circulation to  
545 maintain immune homeostasis. *Immunity*, **51**(4), 625-637.
- 546 **Valanne, S., Wang, J., Rämét, M.** (2011). The *Drosophila* Toll signalling pathway. *J. Immunol.*  
547 **186**, 649-656.
- 548 **Wong, C. N. A., Ng, P. and Douglas, A. E.** (2011). Low-diversity bacterial community in the  
549 gut of the fruitfly *Drosophila melanogaster*. *Environ. Microbiol.* **13**, 1889–1900.
- 550 **Woting, A., & Blaut, M.** (2018). Small intestinal permeability and gut-transit time determined  
551 with low and high molecular weight fluorescein isothiocyanate-dextrans in C3H  
552 mice. *Nutrients*, **10**(6), 685.
- 553 **Yerushalmi, G. Y., Misyura, L., MacMillan, H. A. and Donini, A.** (2018). Functional  
554 plasticity of the gut and the Malpighian tubules underlies cold acclimation and mitigates  
555 cold-induced hyperkalemia in *Drosophila melanogaster*. *J. Exp. Biol.* **221**, jeb174904.
- 556 **Zhang, J., Marshall, K. E., Westwood, J. T., Clark, M. S., & Sinclair, B. J.** (2011). Divergent  
557 transcriptomic responses to repeated and single cold exposures in *Drosophila*  
558 *melanogaster*. *J. Exp. Biol.* **214**(23), 4021-4029.  
559

560  
561

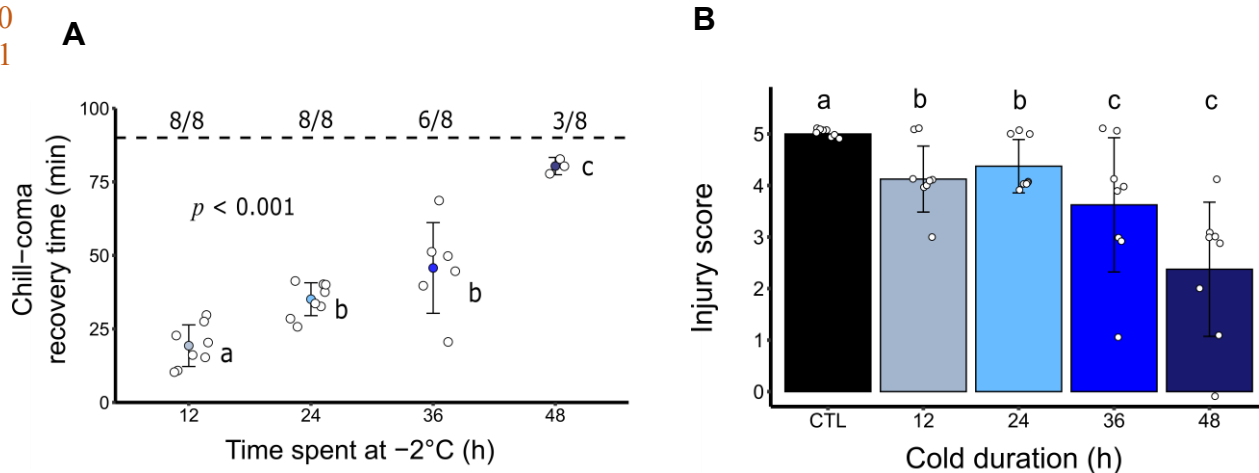

562  
563

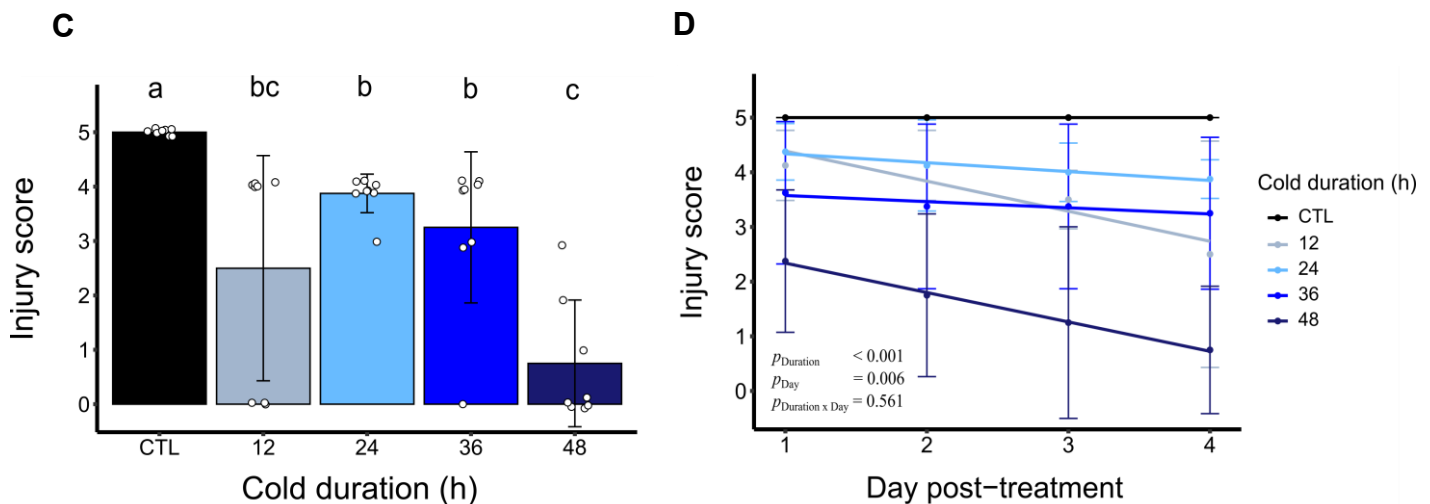

564

565

566 **Figure 1. Chilling injuries in *L. migratoria* increase with longer cold stresses.)** A) Locusts  
567 were observed for 90 mins post-chilling and were marked as having recovered when they were  
568 able to stand on all six legs. Values above the dashed black line represent the number of locusts  
569 in each cold exposure group that recovered before 90 min. Open points represent individual  
570 CCRT for each locust.. Locust injury scores were then assessed B) one day and C) four days  
571 after cold exposures ( $P < 0.001$  for both plots). Groups sharing the same letter are not  
572 significantly different. Open data points represent individual injury scores, and are slightly  
573 vertically scattered around scores for clarity. D) Plot showing the decline in survival over the  
574 four day period for each group ( $n = 8$ ). Data points shown represent mean  $\pm$  s.d.

575

576

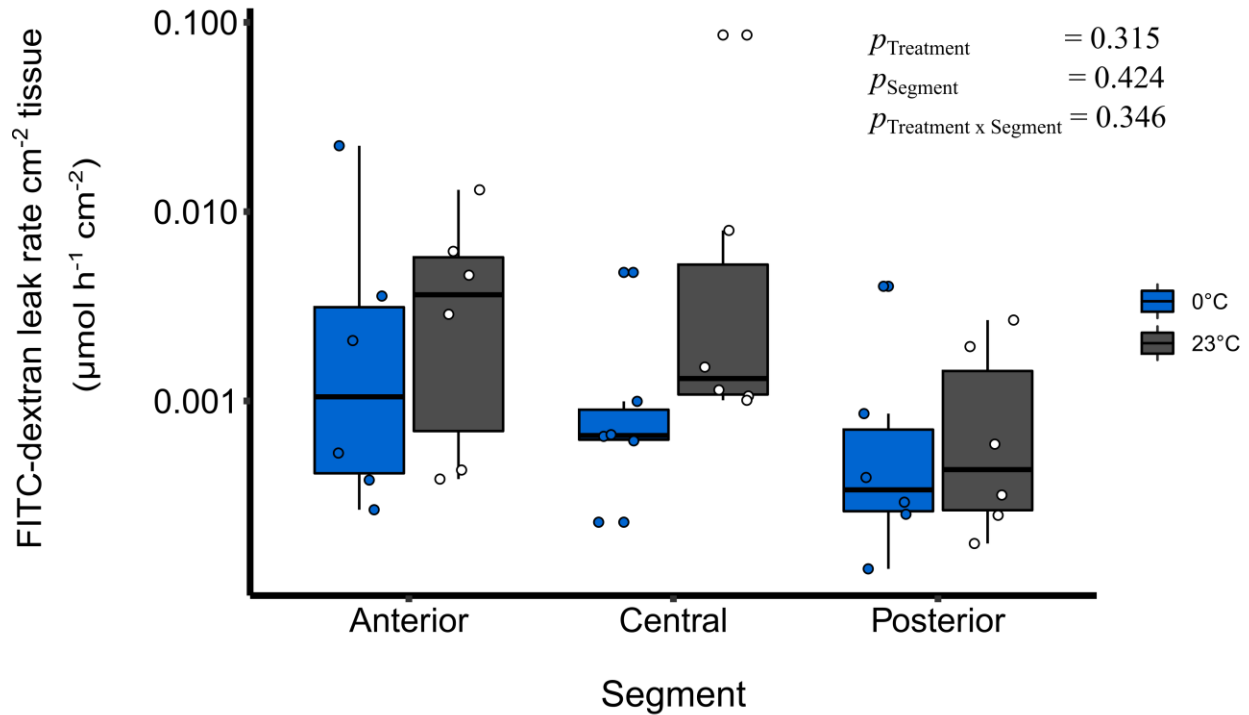

577  
578  
579  
580  
581  
582  
583  
584  
585

**Figure 2. Leak rates of FITC-dextran per cm<sup>2</sup> of tissue are similar both in the cold and at room temperature.** Log<sub>10</sub> values of FITC-dextran leak rates are shown for each of the three segments (anterior, central, and posterior; n=6 samples per treatment, with n=12 overall per segment). Box plot midlines represent median values. Blue and white-filled points represent individual samples taken per treatment.



586 **Table 1. Bacterial CFU after plating locust hemolymph immediately, or 6 h, following cold**  
587 **exposures at -2°C.** A positive control group was injected with a bacterial solution before  
588 extracting hemolymph after 1 h at -2°C. Male and female locusts in all groups were used in a 1:1  
589 ratio.

590  
591

| Experimental design           | Sample size | Bacterial concentration (CFU mL <sup>-1</sup> hemolymph) |
|-------------------------------|-------------|----------------------------------------------------------|
| Positive control              | 4           | 5.46 x 10 <sup>5</sup> ± 8.34 x 10 <sup>4</sup>          |
| Immediately after cold stress |             |                                                          |
| Control                       | 6           | 0                                                        |
| 12 h                          | 6           | 0                                                        |
| 24 h                          | 6           | 0                                                        |
| 36 h                          | 6           | 0                                                        |
| 48 h                          | 10          | 0                                                        |
| 6 h following cold stress     |             |                                                          |
| Control                       | 6           | 0                                                        |
| 12 h                          | 6           | 0                                                        |
| 24 h                          | 6           | 0                                                        |
| 36 h                          | 6           | 0                                                        |
| 48 h                          | 6           | 0                                                        |

592  
593
